# Supplementary material
Source: PubMed Central journal article supplement (PMC8632674)
Supplement: 41375_2021_1466_MOESM1_ESM.pdf [file 41375_2021_1466_MOESM1_ESM.pdf]

## SUPPLEMENTARY DATA

### Title

Poor outcome of patients with COVID-19 after CAR T-cell therapy for B-cell malignancies:  
Results of a multicenter study on behalf of the European Society for Blood and Marrow  
Transplantation (EBMT) Infectious Diseases Working Party and the European Hematology  
Association (EHA) Lymphoma Group

Supplementary Figure 1. COVID-19 clinical report form

|                                                                                                                                                                                                                                                                                                                                                                    |                                                                                               |
|--------------------------------------------------------------------------------------------------------------------------------------------------------------------------------------------------------------------------------------------------------------------------------------------------------------------------------------------------------------------|-----------------------------------------------------------------------------------------------|
| <b>Impact of COVID-19 in CAR-T cell recipients</b><br>EBMT-IDWP<br>Non-Interventional Prospective Study<br>Patients diagnosed <b>before or on December 31<sup>st</sup> 2020</b> can be included if <b>tested positive by PCR</b><br>Patients diagnosed <b>after December 31<sup>st</sup> 2020</b> can be included if <b>tested positive by PCR or antigen test</b> | <b>CRF</b><br><b>STUDY PERIOD</b><br>FROM MARCH 1 <sup>ST</sup> 2020<br>UPDATED ON 15-02-2021 |
| <b>Patient Identification</b>                                                                                                                                                                                                                                                                                                                                      |                                                                                               |

**Centre number (CIC)** \_\_\_\_\_  
**Hospital** \_\_\_\_\_  
**City / Country** \_\_\_\_\_  
**Contact person** \_\_\_\_\_  
**Contact person e-mail** \_\_\_\_\_

**Patient Unique Identification Code (UIC)** \_\_\_\_\_  
**Hospital Unique Patient Number (UPN)** \_\_\_\_\_  
**Date of birth** \_\_\_\_\_ (yyyy-mm-dd)

**Sex**  
 male  
 female

**Date of this report** \_\_\_\_\_ (yyyy-mm-dd)

**Previously registered to the EBMT COVID-19 study**

- Yes
- No: [please complete the registration form](#)

**This form should be completed 6 weeks after covid-19 diagnosis OR if the patient is deceased. If the patient is unresolved and alive after 6 weeks/at completion of this report, please update us again 12 weeks after diagnosis**

NOTE: If your country/center requires an ethical permit to submit this type of data, please, leave UIC and UPN blank and only give year of birth and date and month of transplant. We can then go back later after correct permits have been obtained

### Basic CAR-T data

**CAR-T cell type (target antigen)**

- CD-19
- BCM
- Other

**Costimulatory molecule**

- 41-BB
- CD28
- CD28 and 41BB
- Other

**Infusion date**

\_\_\_\_\_ (yyyy-mm-dd)

**Previous SCT**

- allogeneic
- autologous
- None

**Previous transplant date**

\_\_\_\_\_ (yyyy-mm-dd)

### Baseline disease data

**1. Date of initial diagnosis**

\_\_\_\_\_ (yyyy-mm-dd)

**2. Primary disease diagnosis (for which the CAR-T cells was given)**

- Acute Leukaemia
  - Myelogenous (AML)
  - Lymphoblastic (old ALL)
- Chronic Leukaemia
  - Chronic Lymphocytic Leukaemia
- Lymphoma
  - Non Hodgkin
  - Hodgkin's Disease
- Myeloma /Plasma cell disorder
- Other diagnosis,  
specify: \_\_\_\_\_

**3. Disease status before SARS-CoV-2 diagnosis:**

- Complete remission
- Partial remission
- Relapse
- Progression
- Refractory disease
- 1st line therapy

**4. Date of last course of prior therapy** \_\_\_\_\_ (yyyy-mm-dd)

**Date of lymphodepletion** \_\_\_\_\_ (yyyy-mm-dd)

**Type of lymphodepletion (specify)** \_\_\_\_\_

**Cytokine release syndrome before COVID-19**

- Yes; please give max grade (EBMT/ISCT) \_\_\_\_\_
- No
- Unknown

**Neurotoxicity before COVID-19**

- Yes; if yes, please, give max grade (EBMT ISCT) \_\_\_\_\_
- No
- Unknown

**5. Performance status: Karnofsky/Lansky at the time of SARS-CoV-2 diagnosis**

| Karnofsky status                                                                                     | Lansky Scale                                                                             | Grade      |
|------------------------------------------------------------------------------------------------------|------------------------------------------------------------------------------------------|------------|
|                                                                                                      | <b>(recipient age ≥ 1 year and &lt;16 years)</b>                                         |            |
| <input type="checkbox"/> Normal, no complaints                                                       | Fully active                                                                             | <b>100</b> |
| <input type="checkbox"/> Able to carry on normal activities. Minor signs or symptoms of disease      | Minor restriction in physically strenuous play                                           | <b>90</b>  |
| <input type="checkbox"/> Normal activity with effort                                                 | Restricted in strenuous play, tires more easily, otherwise active                        | <b>80</b>  |
| <input type="checkbox"/> Care for self. Unable to carry on normal activity or to do active work      | Both greater restrictions of, and less time spent in active play                         | <b>70</b>  |
| <input type="checkbox"/> Requires occasional assistance, but able to care for most of his/her needs  | Ambulatory up to 50% of time, limited active play with assistance/supervision            | <b>60</b>  |
| <input type="checkbox"/> Requires considerable assistance and frequent medical care                  | Considerable assistance required for any active play, fully able to engage in quiet play | <b>50</b>  |
| <input type="checkbox"/> Disabled. Requires special care and assistance                              | Able to initiate quite activities                                                        | <b>40</b>  |
| <input type="checkbox"/> Severely disabled. Hospitalization indicated though death nonimminent       | Needs considerable assistance for quiet activity                                         | <b>30</b>  |
| <input type="checkbox"/> Very sick. Hospitalization necessary. Active supportive treatment necessary | Limited to very passive activity initiated by others (e.g., TV)                          | <b>20</b>  |
| <input type="checkbox"/> Moribund                                                                    | Completely disabled, not even passive play                                               | <b>10</b>  |

## Comorbidities at the time of COVID-19

### 6. Comorbidities

- Smoker (current)     No                       Yes  
 Smoker (former)     No                       Yes  
 Alcohol abuser         No                       Yes  
 Narcotics               No                       Yes  
 Dyslipidemia         No                       Yes  
 High blood pressure  No                       Yes  
 Cardiovascular        No                       Yes, specify \_\_\_\_\_  
 Secondary malignancy  No                       Yes, specify \_\_\_\_\_  
 Other, specify \_\_\_\_\_

## Biological and clinical variables at time of COVID-19 episode

**All biological and clinical variables should be recorded at the time of screening for SARS-CoV-2/time of diagnosis**

### 8. Blood levels at the time of screening for SARS-CoV-2/time of diagnosis

|                                               | Value + unit (if different from stated unit) |
|-----------------------------------------------|----------------------------------------------|
| Absolute neutrophil count ( $\times 10^9/L$ ) |                                              |
| Absolute lymphocyte count ( $\times 10^9/L$ ) |                                              |
| Total platelet count ( $\times 10^9/L$ )      |                                              |
| Creatinine levels (mg/dl)                     |                                              |
| C reactive protein levels (mg/L)              |                                              |
| LDH levels                                    |                                              |
| IgG level                                     |                                              |

### 9. Bronchiolitis obliterans syndrome (BOS) before Covid-19

- No  
 Yes  
 Unknown

### 11. Other lung pathology for example BOOP

- No  
 Yes, specify \_\_\_\_\_  
 Unknown

### 12. Corticosteroid therapy for other reasons than covid-19

- No  
 Unknown  
 Yes, specify type and dose (mg/d)  
 Prednisone \_\_\_\_\_

Methylprednisolone \_\_\_\_\_

Dexamethasone \_\_\_\_\_

Other \_\_\_\_\_

**13. Immunosuppressant drug(s) within 2 months prior to and after the covid-19 episode**

Unknown

| Drug name |
|-----------|
|           |
|           |
|           |
|           |
|           |

**14. Vitamin D levels in the 3 months prior to SARS-CoV-2 diagnosis (if multiple levels are available, please note the most recent one)**

unknown/not available

available: 25-hydroxycholecalciferol \_\_\_\_\_ ng/mL or \_\_\_\_\_ nmol/L

1,25-dihydroxycholecalciferol \_\_\_\_\_ in pg/mL or \_\_\_\_\_ in pmol/L

**Clinical signs/symptoms at SARS-CoV-2 diagnosis**

**15. Clinical signs/symptoms recorded during SARS-CoV-2 episode**

- Asymptomatic  No  Yes  Unknown
- Fever  No  Yes, date \_\_\_\_\_ (yyyy-mm-dd)  Unknown
- Upper respiratory symptoms  No  Yes, date \_\_\_\_\_ (yyyy-mm-dd)  Unknown
- Rhinorrea/ nasal congestion  No  Yes  Unknown
- Sinusitis  No  Yes  Unknown
- Taste disturbance  No  Yes  Unknown
- Smell disturbance  No  Yes  Unknown
- Otitis  No  Yes  Unknown
- Pharyngitis and/or tonsillitis  No  Yes  Unknown
- Cough  No  Yes  Unknown
- Sputum production  No  Yes  Unknown

- Fatigue  No  Yes  Unknown
- Myalgia or arthralgia  No  Yes  Unknown
- Diarrhoea  No  Yes  Unknown
- Vomiting  No  Yes  Unknown
- Conjunctivitis  No  Yes  Unknown
- Oxygen requirement to maintain oxygen sat >92%  No  Yes  Unknown

**16. Please specify where the patient was attended during the SARS-COV-2 infection**

- Outpatient
- Hospitalised, date of admission \_\_\_\_\_ (yyyy-mm-dd)

**17. Was this hospitalisation related to SARS-COV-2 infection?**

- No
- Yes

**18. Intensive care unit admission**

- No
- Yes, date of admission \_\_\_\_\_ (yyyy-mm-dd)
- date of discharge \_\_\_\_\_ (yyyy-mm-dd)

**19. Ventilation:**

- Use of non-invasive ventilation
- Use of invasive ventilation
- No need for ventilation

**20. Use of high-flow oxygen therapy**

- No
- Yes
- Unknown

**Microbiological data**

**21. Was antigen testing performed?**

- No
- Yes, date of test \_\_\_\_\_ (yyyy-mm-dd)
- positive for SARS-CoV-2
- negative for SARS-CoV-2

**22. Was PCR test performed?**

- No
- Yes, date of test \_\_\_\_\_ (yyyy-mm-dd)
- positive for SARS-CoV-2

negative for SARS-CoV-2

**23. PCR technique used (commercial PCR data) for covid-19/SARS-COV-2 and CARVs. Describe PCR platform (manufacturer) if known**

---

**24. Virus/es detected in samples from URT secretions (mark all typers and subtypes of CARVs detected in the sample/episode)**

|                               |                                    |                                   |                                     |
|-------------------------------|------------------------------------|-----------------------------------|-------------------------------------|
| SARS-CoV-2                    | <input type="checkbox"/> positive  | <input type="checkbox"/> negative | <input type="checkbox"/> not tested |
| Coronavirus 229E              | <input type="checkbox"/> positive  | <input type="checkbox"/> negative | <input type="checkbox"/> not tested |
| Coronavirus HKU1              | <input type="checkbox"/> positive  | <input type="checkbox"/> negative | <input type="checkbox"/> not tested |
| Coronavirus NL63              | <input type="checkbox"/> positive  | <input type="checkbox"/> negative | <input type="checkbox"/> not tested |
| Coronavirus OC43              | <input type="checkbox"/> positive  | <input type="checkbox"/> negative | <input type="checkbox"/> not tested |
| Influenza A type _____        | <input type="checkbox"/> positive; | <input type="checkbox"/> negative | <input type="checkbox"/> not tested |
| Influenza B                   | <input type="checkbox"/> positive  | <input type="checkbox"/> negative | <input type="checkbox"/> not tested |
| Human metapneumovirus         | <input type="checkbox"/> positive  | <input type="checkbox"/> negative | <input type="checkbox"/> not tested |
| Human parainfluenza virus 1   | <input type="checkbox"/> positive  | <input type="checkbox"/> negative | <input type="checkbox"/> not tested |
| Human parainfluenza virus 2   | <input type="checkbox"/> positive  | <input type="checkbox"/> negative | <input type="checkbox"/> not tested |
| Human parainfluenza virus 3   | <input type="checkbox"/> positive  | <input type="checkbox"/> negative | <input type="checkbox"/> not tested |
| Human parainfluenza virus 4   | <input type="checkbox"/> positive  | <input type="checkbox"/> negative | <input type="checkbox"/> not tested |
| Respiratory syncytial virus   | <input type="checkbox"/> positive  | <input type="checkbox"/> negative | <input type="checkbox"/> not tested |
| Enterovirus                   | <input type="checkbox"/> positive  | <input type="checkbox"/> negative | <input type="checkbox"/> not tested |
| Rhinovirus                    | <input type="checkbox"/> positive  | <input type="checkbox"/> negative | <input type="checkbox"/> not tested |
| Enterovirus/rhinovirus (EvRh) | <input type="checkbox"/> positive  | <input type="checkbox"/> negative | <input type="checkbox"/> not tested |
| Adenovirus                    | <input type="checkbox"/> positive  | <input type="checkbox"/> negative | <input type="checkbox"/> not tested |
| Human Bocavirus               | <input type="checkbox"/> positive  | <input type="checkbox"/> negative | <input type="checkbox"/> not tested |
| Other _____                   | <input type="checkbox"/> positive  | <input type="checkbox"/> negative | <input type="checkbox"/> not tested |

**25. Was a variant of SARS-CoV-2 detected?**

Unknown

No

Yes, please specify:

B.1.1.1.7 (British variant)

B.1.351 (South African variant)

P.1 (Brazilian variant)

CAL.20C (Southern Californian variant)

Other \_\_\_\_\_

**26. Bronchoalveolar (BAL) performed**

- No
- Yes, date of test \_\_\_\_\_ (yyyy-mm-dd)

**27. BAL findings (describe significant findings only)**

Bacteria (describe all types and subtypes of bacteria detected following standard nomenclature) \_\_\_\_\_  
\_\_\_\_\_

Virus/es (describe all types and subtypes of CARVs detected following standard nomenclature, including CMV and several other tested viruses). If CMV was found, please, give viral load. \_\_\_\_\_

Fungi including P Jirovecii (describe all types and subtypes of fungus detected following standard nomenclature, as well as galactomannan >1) \_\_\_\_\_

**28. Co-infection (mark according microbiological findings)**

- None
- Other virus than SARS-CoV-2
- Bacteria
- Fungal
- Combination, specify \_\_\_\_\_

**COVID-19 treatment**

**28. Antiviral drugs used**

- None

| Drug name                                    | Dose/schedule | Start date | End date |
|----------------------------------------------|---------------|------------|----------|
| <input type="checkbox"/> Remdesvir           |               |            |          |
| <input type="checkbox"/> Lopenavir/ritonavir |               |            |          |
| <input type="checkbox"/> Favipavir           |               |            |          |
| Other _____                                  |               |            |          |
| Other _____                                  |               |            |          |
| Other _____                                  |               |            |          |



**29. Anti-coagulation agents**

None

| Drug name                                             | Dose/schedule | Start date | End date |
|-------------------------------------------------------|---------------|------------|----------|
| <input type="checkbox"/> Low Molecular Weight Heparin |               |            |          |
| <input type="checkbox"/> Unfractionated heparin       |               |            |          |
| <input type="checkbox"/> Fondaparinux                 |               |            |          |
| <input type="checkbox"/> Rivaroxaban                  |               |            |          |
| <input type="checkbox"/> Dabigatran                   |               |            |          |
| <input type="checkbox"/> Apixaban                     |               |            |          |
| <input type="checkbox"/> Edoxaban                     |               |            |          |
| <input type="checkbox"/> Acenocumarol                 |               |            |          |
| <input type="checkbox"/> Warfarin                     |               |            |          |
| Other _____                                           |               |            |          |
| Other _____                                           |               |            |          |
| Other _____                                           |               |            |          |

**30. Anti-inflammatory drugs for treatment of COVID-19 for example IL-6 receptor inhibitors; corticosteroids, colchicine, etc)**

None

| Drug name                            | Dose/schedule | Start date | End date |
|--------------------------------------|---------------|------------|----------|
| <input type="checkbox"/> Tozilizumab |               |            |          |
| <input type="checkbox"/> Siltuximab  |               |            |          |
| <input type="checkbox"/> Ruxolutinib |               |            |          |
| <input type="checkbox"/> Anakinra    |               |            |          |
| <input type="checkbox"/> Baricitinib |               |            |          |
| <input type="checkbox"/> Eculizumab  |               |            |          |
| <input type="checkbox"/> Colchicine  |               |            |          |
| Other _____                          |               |            |          |
| Other _____                          |               |            |          |
| Other _____                          |               |            |          |

**31. Immune or cellular therapies given for covid-19 episode**

unknown

no

yes, please specify:

- immunoglobulins, date \_\_\_\_\_ (yyyy-mm-dd)
- convalescent plasma, date \_\_\_\_\_ (yyyy-mm-dd)
- anti-SARS-CoV-2 monoclonal antibodies, date \_\_\_\_\_ (yyyy-mm-dd)
- cellular therapy, specify type date \_\_\_\_\_ (yyyy-mm-dd)
  - mesenchymal cells
  - other \_\_\_\_\_
  - unknown

## Vaccination

**31. Did this patient receive a covid-19 vaccine? (before or after the SARS-CoV-2 infection/COVID-19 episode)**

- unknown, continue to Q35
- no, please specify reason and continue to Q35
  - not yet available
  - patient declined
  - decided by physician due to current disease status
  - other, specify \_\_\_\_\_
- Yes, please specify in Q34.

**32. Vaccination brand and date**

| Vaccine brand                                 | First Vaccine/dose       | Second Vaccine/dose      | Third Vaccine/dose       |
|-----------------------------------------------|--------------------------|--------------------------|--------------------------|
|                                               | Date<br>_____            | Date<br>_____            | Date<br>_____            |
| Pfizer/BioNTech COVID-19 mRNA Vaccine NT162b2 | <input type="checkbox"/> | <input type="checkbox"/> | <input type="checkbox"/> |
| AstraZeneca/Oxford COVID-19 AZD1222           | <input type="checkbox"/> | <input type="checkbox"/> | <input type="checkbox"/> |
| Moderna COVID-19 Vaccine (mRNA-1273)          | <input type="checkbox"/> | <input type="checkbox"/> | <input type="checkbox"/> |
| Sputnik V by Gamaleya Research Institute      | <input type="checkbox"/> | <input type="checkbox"/> | <input type="checkbox"/> |
| J&J JNJ-78436735                              | <input type="checkbox"/> | <input type="checkbox"/> | <input type="checkbox"/> |
| CureVac CVnCoV mRNA Vaccine                   | <input type="checkbox"/> | <input type="checkbox"/> | <input type="checkbox"/> |
| Other _____                                   | <input type="checkbox"/> | <input type="checkbox"/> | <input type="checkbox"/> |

**33. Did the patient receive an influenza vaccine in the 12 months prior to SARS-CoV-2 diagnosis?**

- unknown
- no

yes, date \_\_\_\_\_ (yyyy-mm-dd)

## Clinical data and outcome

### 34. Pulmonary radiological findings

- Unknown
- No
- Yes, describe type of radiology and pulmonary pattern

### 35. Upper respiratory tract disease (combination of upper respiratory symptoms (i.e. rhinorrhea, sinusitis, otitis, or pharyngitis) and detection of COVID-19 in the upper RT)

- Yes
- No
- Unknown

#### Lower respiratory tract disease category

**Possible:** detection of a covid-19 in the upper respiratory tract **with** clinical symptoms of tracheitis, bronchitis, bronchiolitis, or pneumonia (new onset of cough, rales, wheezing, cough related chest pain, shortness of breath, dyspnea, or hypoxia) **in conjunction with** the identification of new pulmonary infiltrates by chest X-ray or thoracic CT scan.

### 36. Lower RTD

- Possible
- Probably
- Proven

### 37. Covid-19 resolution

- Unknown
- Unresolved, date last checked \_\_\_\_\_ (yyyy-mm-dd)
- Resolution, date \_\_\_\_\_ (yyyy-mm-dd)
- Resolution (clinical if no PCR available), date \_\_\_\_\_ (yyyy-mm-dd)

38. Date of hospital discharge \_\_\_\_\_ (yyyy-mm-dd)

39. Date of last follow-up \_\_\_\_\_ (yyyy-mm-dd)

### 40. Primary disease relapse status at last follow-up

- Complete remission
- Partial remission
- Relapse, date of first \_\_\_\_\_ (yyyy-mm-dd)
- Progression
- Refractory disease

**41. Status at last follow-up**

Alive

Dead

**42. If dead, cause of death (tick all that apply)**

COVID-19 (unresolved)

COVID-19 (resolved)

relapse

other (describe all attributable causes of death) \_\_\_\_\_

**Comments**

---

**Thank you!!!!**

***Please send the completed form to:***

Nina Knelange

**EBMT Data Office Leiden / IDWP**

Fax +49 711 4900 8723 / +49 180 500 290 623

E-mail: [idwpebmt@lumc.nl](mailto:idwpebmt@lumc.nl)

Supplementary Table 1. clinical characteristics of patients infected by SARS-Cov-2

| <b>Characteristic</b>                                                        | <b>Number (Proportion)</b> |
|------------------------------------------------------------------------------|----------------------------|
| Country of patient                                                           |                            |
| Italy                                                                        | 4 (7.1)                    |
| Spain                                                                        | 17 (30.4)                  |
| France                                                                       | 11 (19.6)                  |
| United Kingdom                                                               | 8 (14.3)                   |
| Netherlands                                                                  | 7 (12.5)                   |
| Czech Republic                                                               | 3 (5.4)                    |
| Germany                                                                      | 2 (3.6)                    |
| Sweden                                                                       | 1 (1.8)                    |
| Israel                                                                       | 1 (1.8)                    |
| Portugal                                                                     | 1 (1.8)                    |
| Belgium                                                                      | 1 (1.8)                    |
| Prior HCT                                                                    |                            |
| Auto HCT                                                                     | 19 (33.9)                  |
| Allo HCT                                                                     | 4 (7.1)                    |
| None                                                                         | 33 (58.9)                  |
| CAR T-cell product costimulatory domain                                      |                            |
| CD28                                                                         | 22 (39.3)                  |
| 41BB                                                                         | 27 (48.2)                  |
| CD28 and 41BB                                                                | 3 (5.4)                    |
| Missing                                                                      | 4 (7.1)                    |
| Lymphodepleting chemotherapy                                                 |                            |
| Fludarabine/cyclophosphamide                                                 | 53 (94.6)                  |
| Bendamustine                                                                 | 0 (0.0)                    |
| No LD chemo                                                                  | 0 (0.0)                    |
| Other                                                                        | 1 (1.8)                    |
| Unknown                                                                      | 2 (3.6)                    |
| Cytokine Release Syndrome (CRS) maximum grade                                |                            |
| No                                                                           | 15 (26.8)                  |
| 1                                                                            | 22 (39.3)                  |
| 2                                                                            | 15 (26.8)                  |
| 3                                                                            | 3 (5.4)                    |
| 4                                                                            | 0 (0.0)                    |
| Missing                                                                      | 1 (1.8)                    |
| Immune effector cell-associated neurotoxicity syndrome (ICANS) maximum grade |                            |
| No                                                                           | 45 (80.4)                  |
| 1                                                                            | 4 (7.1)                    |
| 2                                                                            | 4 (7.1)                    |
| 3                                                                            | 2 (3.6)                    |
| 4                                                                            | 0 (0.0)                    |

|                                                |                             |
|------------------------------------------------|-----------------------------|
| Missing                                        | 1 (1.8)                     |
| Lung disease (BOS) before COVID-19             |                             |
| Yes                                            | 1 (1.8)                     |
| No                                             | 45 (80.4)                   |
| Missing                                        | 10 (17.9)                   |
| Other lung pathology for example BOOP          |                             |
| Yes                                            | 8 (14.3)                    |
| No                                             | 47 (83.9)                   |
| Missing                                        | 1 (1.8)                     |
| Symptoms during COVID-19                       |                             |
| Asymptomatic                                   | 7 (12.5)                    |
| Fever                                          | 36 (64.3)                   |
| Upper respiratory symptoms                     | 29 (51.8)                   |
| Cough                                          | 32 (57.1)                   |
| Fatigue                                        | 22 (39.3)                   |
| Myalgia/Arthralgia                             | 10 (17.9)                   |
| Vomiting                                       | 1 (1.8)                     |
| Diarrhea                                       | 8 (14.3)                    |
| Laboratory results at time of COVID-19         |                             |
| Neutrophils (x10 <sup>9</sup> /L)              | 2.2, 0.0 - 19.9 (48 pts)    |
| Lymphocytes (x10 <sup>9</sup> /L)              | 0.6, 0.0 - 2.4 (45 pts)     |
| CD19 (cells x10 <sup>9</sup> )                 | 0.0 (0.0 - 0.0 ) (4 pts)    |
| CD3+/CD4+ (cells x10 <sup>9</sup> )            | 42.0, 25.0 - 192.0 (5 pts)  |
| CD3+/CD8+ (cells x10 <sup>9</sup> )            | 56.0, 17.0 - 122.0 (5 pts)  |
| IgG (g/l)                                      | 3.3, 0.4 - 18.0 (30 pts)    |
| Platelets (x10 <sup>9</sup> /L)                | 121, 8 - 481 (49 pts)       |
| CRP (mg/L)                                     | 27.5, 0.2 - 264.0 (40 pts)  |
| Creatinine (mg/dl)                             | 0.8, 0.2 - 3.0 (47 pts)     |
| LDH level                                      | 256.0, 2.6 - 637.0 (39 pts) |
| Radiology CT scan                              |                             |
| Abnormalities Yes                              | 38 (67.9)                   |
| Abnormalities No                               | 6 (10.7)                    |
| Not performed                                  | 12 (21.4)                   |
| COVID-19 vaccination before COVID-19 infection |                             |
| Yes                                            | 2 (3.6)                     |
| No                                             | 43 (76.8)                   |
| Missing or unknown                             | 11 (19.6)                   |
| COVID-19 vaccination after COVID-19            |                             |
| Yes                                            | 7 (12.5)                    |
| No                                             | 38 (67.9)                   |
| Missing or unknown                             | 11 (19.6)                   |

Supplementary Table 2. Univariate analysis for factors associated with mortality

| <b>Univariate analysis</b>                  |                |                                    |          |
|---------------------------------------------|----------------|------------------------------------|----------|
|                                             |                | <b>Mortality<br/>HR (95% C.I.)</b> | <b>P</b> |
| <b>Variable</b>                             |                |                                    |          |
| Age at time of COVID-19                     |                |                                    |          |
|                                             | 10-year effect | 1.44 (1.07-1.94)                   | 0.015    |
|                                             | <60 years      | 1.00                               |          |
|                                             | >= 60 years    | 1.47 (0.67-3.23)                   | 0.3      |
| Sex                                         |                |                                    |          |
|                                             | Male           | 1.00                               |          |
|                                             | Female         | 0.88 (0.40-1.97)                   | 0.8      |
| Time from CAR T-cell infusion to COVID-19   |                |                                    |          |
|                                             | Continuous     | 0.94 (0.88-1.01)                   | 0.1      |
|                                             | <6 months      | 1.00                               |          |
|                                             | >= 6 months    | 0.68 (0.31-1.51)                   | 0.34     |
| Metabolic comorbidity                       |                |                                    |          |
|                                             | No             |                                    |          |
|                                             | Yes            | 2.78 (1.26-6.12)                   | 0.01     |
| Pre-existing lung pathology                 |                |                                    |          |
|                                             | No             | 1.00                               |          |
|                                             | Yes            | 1.99 (0.74-5.34)                   | 0.17     |
| CRS grade                                   |                |                                    |          |
|                                             | 0              | 1.00                               |          |
|                                             | >=1            | 2.32 (0.79- 6.78)                  | 0.13     |
| ICANS grade                                 |                |                                    |          |
|                                             | 0              | 1.00                               |          |
|                                             | >=1            | 0.66 (0.20-2.21)                   | 0.5      |
| Tumor remission status at time of COVID-19  |                |                                    |          |
|                                             | CR             | 1.00                               |          |
|                                             | Other          | 2.46 (1.12-5.43)                   | 0.026    |
| COVID-19 treatment with convalescent plasma |                |                                    |          |
|                                             | No             | 1.00                               |          |
|                                             | Yes            | 0.62 (0.25-1.54)                   | 0.3      |

|                                             |                                            |                  |       |
|---------------------------------------------|--------------------------------------------|------------------|-------|
| In patients admitted to hospital only       |                                            |                  |       |
| COVID-19 treatment with convalescent plasma |                                            |                  |       |
|                                             | No                                         |                  |       |
|                                             | Yes                                        | 0.37 (0.15-0.93) | 0.03  |
| Wave                                        |                                            |                  |       |
|                                             | 1st - Up to End of August 2020             | 1.00             | 0.5   |
|                                             | 2nd - September 2020 - End of January 2021 | 0.61 (0.26-1.43) |       |
|                                             | 3rd - From February 2021                   | 0.56 (0.15-2.05) |       |
| Performance status                          |                                            |                  |       |
|                                             | 10-point effect                            | 0.74 (0.60-0.91) | 0.004 |
